# Supplementary material for: HLA-DQB1*03 Confers Susceptibility to Chronic Hepatitis C in Japanese: A Genome-Wide Association Study
Source: PubMed Central journal article supplement (PMC3871580; doi:10.1371/journal.pone.0084226), 2013-12-20
Supplement: pone.0084226.s008.pdf [file pone.0084226.s008.pdf]

**Table S1. Results of GWAS.**

| SNP        | Chr | Position  | Allele<br>[1/2] | Case |     |     | Control |      |      | MAF   |         | OR <sup>a</sup> (95%CI) | P <sup>b</sup> | Nearest gene |                     |
|------------|-----|-----------|-----------------|------|-----|-----|---------|------|------|-------|---------|-------------------------|----------------|--------------|---------------------|
|            |     |           |                 | 11   | 12  | 22  | 11      | 12   | 22   | Case  | Control |                         |                |              |                     |
| rs6933400  | 6   | 31015155  | TC              | 11   | 123 | 347 | 29      | 485  | 2449 | 0.151 | 0.092   | 0.57                    | (0.47-0.69)    | 1.92E-08     | <i>LOC100129065</i> |
| rs6911476  | 6   | 26720342  | AG              | 4    | 88  | 389 | 7       | 328  | 2625 | 0.100 | 0.058   | 0.55                    | (0.44-0.7)     | 6.11E-07     | <i>ABT1</i>         |
| rs7122630  | 11  | 20913841  | TC              | 476  | 5   | 0   | 2961    | 1    | 0    | 0.005 | 0.000   | 30.95                   | (3.61-265.18)  | 9.33E-07     | <i>NELL1</i>        |
| rs2523477  | 6   | 31468368  | TC              | 377  | 100 | 4   | 2583    | 359  | 20   | 0.112 | 0.067   | 1.75                    | (1.4-2.19)     | 9.98E-07     | <i>LOC100129668</i> |
| rs2523476  | 6   | 31469403  | TC              | 4    | 100 | 377 | 20      | 359  | 2583 | 0.112 | 0.067   | 0.57                    | (0.46-0.71)    | 9.98E-07     | <i>LOC100129668</i> |
| rs7356849  | 6   | 26504718  | AG              | 384  | 92  | 5   | 2597    | 355  | 11   | 0.106 | 0.064   | 1.75                    | (1.39-2.2)     | 1.56E-06     | <i>BTN2A2</i>       |
| rs2596551  | 6   | 31440218  | AC              | 374  | 101 | 6   | 2557    | 376  | 25   | 0.117 | 0.072   | 1.72                    | (1.38-2.14)    | 1.83E-06     | <i>LOC729816</i>    |
| rs11753872 | 6   | 29844921  | TG              | 5    | 103 | 373 | 21      | 388  | 2548 | 0.117 | 0.073   | 0.59                    | (0.47-0.73)    | 2.24E-06     | <i>HCP5P14</i>      |
| rs9275572  | 6   | 32786977  | TC              | 96   | 217 | 168 | 366     | 1317 | 1280 | 0.425 | 0.346   | 0.71                    | (0.62-0.82)    | 2.62E-06     | <i>HLA-DQA2</i>     |
| rs1883214  | 6   | 26414663  | AC              | 7    | 113 | 361 | 17      | 474  | 2472 | 0.132 | 0.086   | 0.62                    | (0.5-0.76)     | 3.38E-06     | <i>TRNAS-GCU</i>    |
| rs7651342  | 3   | 82582297  | TC              | 386  | 89  | 6   | 2076    | 800  | 85   | 0.105 | 0.164   | 0.60                    | (0.48-0.74)    | 3.69E-06     | <i>CYP51P1</i>      |
| rs11758087 | 6   | 29872422  | TC              | 5    | 103 | 373 | 21      | 394  | 2548 | 0.117 | 0.074   | 0.60                    | (0.48-0.74)    | 3.75E-06     | <i>HCG4P9</i>       |
| rs17475879 | 6   | 30472487  | AG              | 5    | 100 | 376 | 16      | 390  | 2547 | 0.114 | 0.071   | 0.60                    | (0.48-0.74)    | 4.00E-06     | <i>LOC100129192</i> |
| rs9261588  | 6   | 30318786  | AC              | 6    | 99  | 376 | 17      | 394  | 2552 | 0.115 | 0.072   | 0.60                    | (0.48-0.74)    | 4.11E-06     | <i>HLA-L</i>        |
| rs6041027  | 20  | 11926265  | TC              | 142  | 251 | 88  | 682     | 1455 | 825  | 0.444 | 0.476   | 0.72                    | (0.63-0.83)    | 4.21E-06     | <i>BTBD3</i>        |
| rs3094065  | 6   | 30390311  | AG              | 6    | 99  | 376 | 17      | 394  | 2550 | 0.115 | 0.072   | 0.60                    | (0.48-0.74)    | 4.24E-06     | <i>LOC100133303</i> |
| rs3846382  | 4   | 19219037  | AG              | 109  | 224 | 148 | 888     | 1421 | 652  | 0.459 | 0.460   | 1.38                    | (1.2-1.58)     | 5.61E-06     | <i>LOC645174</i>    |
| rs6456730  | 6   | 26592355  | TC              | 389  | 88  | 4   | 2612    | 342  | 9    | 0.100 | 0.061   | 1.71                    | (1.35-2.17)    | 5.63E-06     | <i>BTN2A1</i>       |
| rs10934619 | 3   | 124049863 | AG              | 214  | 211 | 56  | 1017    | 1445 | 501  | 0.336 | 0.413   | 0.72                    | (0.62-0.83)    | 5.97E-06     | <i>DIRC2</i>        |
| rs1488839  | 4   | 19326552  | TC              | 107  | 227 | 147 | 873     | 1436 | 654  | 0.458 | 0.463   | 1.37                    | (1.19-1.57)    | 8.39E-06     | <i>LOC645174</i>    |
| rs3734526  | 6   | 25887715  | AC              | 397  | 80  | 4   | 2642    | 311  | 7    | 0.091 | 0.055   | 1.73                    | (1.36-2.22)    | 8.74E-06     | <i>SLC17A4</i>      |
| rs9275563  | 6   | 32785890  | AG              | 93   | 208 | 180 | 720     | 1448 | 791  | 0.410 | 0.488   | 1.37                    | (1.2-1.58)     | 8.99E-06     | <i>HLA-DQA2</i>     |
| rs3130361  | 6   | 30447543  | AG              | 7    | 102 | 372 | 20      | 420  | 2523 | 0.121 | 0.078   | 0.61                    | (0.49-0.76)    | 9.00E-06     | <i>RPP21</i>        |
| rs3757333  | 6   | 30136585  | TG              | 5    | 104 | 372 | 23      | 403  | 2534 | 0.119 | 0.076   | 0.61                    | (0.49-0.76)    | 9.21E-06     | <i>ZNRD1</i>        |
| rs2508015  | 6   | 31118179  | TC              | 5    | 114 | 362 | 26      | 449  | 2488 | 0.129 | 0.085   | 0.62                    | (0.51-0.77)    | 9.78E-06     | <i>LOC729792</i>    |

MAF; minor allele frequency, Chr; Chromosome, OR; odds ratio, CI; confidence interval.

<sup>a</sup>Odds ratio of allele[1] as reference. <sup>b</sup>P value of Cochran-Armitage trend test.
