# Supplementary material for: HLA-DQB1*03 Confers Susceptibility to Chronic Hepatitis C in Japanese: A Genome-Wide Association Study
Source: PubMed Central journal article supplement (PMC3871580; doi:10.1371/journal.pone.0084226), 2013-12-20
Supplement: pone.0084226.s009.pdf [file pone.0084226.s009.pdf]

**Table S2. Results of 1st replication study.**

| SNP        | Chr | Position  | Allele<br>[1/2] | Case |      |      | Control |     |      | MAF   |         | OR <sup>a</sup> (95%CI) | P <sup>b</sup> |          |
|------------|-----|-----------|-----------------|------|------|------|---------|-----|------|-------|---------|-------------------------|----------------|----------|
|            |     |           |                 | 11   | 12   | 22   | 11      | 12  | 22   | Case  | Control |                         |                |          |
| rs6933400  | 6   | 31015155  | TC              | 34   | 720  | 3602 | 6       | 183 | 924  | 0.090 | 0.088   | 0.97                    | (0.82-1.14)    | 6.73E-01 |
| rs6911476  | 6   | 26720342  | AG              | 15   | 433  | 3909 | 3       | 105 | 1006 | 0.053 | 0.050   | 0.93                    | (0.76-1.16)    | 5.34E-01 |
| rs7122630  | 11  | 20913841  | TC              | 4347 | 9    | 0    | 1108    | 6   | 0    | 0.001 | 0.003   | 0.38                    | (0.14-1.08)    | 5.86E-02 |
| rs2523476  | 6   | 31469403  | TC              | 34   | 482  | 3838 | 6       | 112 | 995  | 0.063 | 0.056   | 0.88                    | (0.72-1.07)    | 2.05E-01 |
| rs2596551  | 6   | 31440218  | AC              | 3813 | 503  | 27   | 992     | 117 | 5    | 0.064 | 0.057   | 1.13                    | (0.93-1.38)    | 2.23E-01 |
| rs11753872 | 6   | 29844921  | TG              | 24   | 548  | 3780 | 6       | 134 | 974  | 0.068 | 0.066   | 0.95                    | (0.79-1.15)    | 6.24E-01 |
| rs9275572  | 6   | 32786977  | TC              | 634  | 2049 | 1673 | 119     | 474 | 519  | 0.381 | 0.320   | 0.77                    | (0.69-0.85)    | 1.40E-07 |
| rs1883214  | 6   | 26414663  | AC              | 34   | 667  | 3656 | 6       | 156 | 952  | 0.084 | 0.075   | 0.89                    | (0.74-1.05)    | 1.72E-01 |
| rs7651342  | 3   | 82582297  | TC              | 3110 | 1134 | 114  | 785     | 302 | 27   | 0.156 | 0.160   | 0.97                    | (0.86-1.11)    | 6.85E-01 |
| rs17475879 | 6   | 30472487  | AG              | 21   | 542  | 3793 | 7       | 125 | 982  | 0.067 | 0.062   | 0.93                    | (0.76-1.12)    | 4.34E-01 |
| rs9261588  | 6   | 30318786  | AC              | 22   | 520  | 3813 | 5       | 128 | 981  | 0.065 | 0.062   | 0.95                    | (0.79-1.16)    | 6.31E-01 |
| rs6041027  | 20  | 11926265  | TC              | 1002 | 2153 | 1192 | 255     | 537 | 320  | 0.478 | 0.471   | 0.97                    | (0.88-1.07)    | 5.37E-01 |
| rs3846382  | 4   | 19219037  | AG              | 1187 | 2179 | 990  | 295     | 538 | 274  | 0.477 | 0.491   | 0.95                    | (0.86-1.04)    | 2.70E-01 |
| rs10934619 | 3   | 124049863 | AG              | 1555 | 2110 | 681  | 384     | 552 | 177  | 0.399 | 0.407   | 0.97                    | (0.88-1.07)    | 5.13E-01 |
| rs1488839  | 4   | 19326552  | TC              | 1194 | 2156 | 1003 | 286     | 564 | 263  | 0.478 | 0.490   | 0.95                    | (0.87-1.05)    | 3.29E-01 |
| rs3734526  | 6   | 25887715  | AC              | 3916 | 389  | 12   | 1013    | 96  | 1    | 0.048 | 0.044   | 1.09                    | (0.87-1.36)    | 4.65E-01 |
| rs3757333  | 6   | 30136585  | TG              | 29   | 553  | 3770 | 6       | 132 | 975  | 0.070 | 0.065   | 0.92                    | (0.76-1.11)    | 3.67E-01 |

MAF; minor allele frequency, Chr; Chromosome, OR; odds ratio, CI; confidence interval.

<sup>a</sup>Odds ratio of allele[1] as reference. <sup>b</sup>P value of Cochran-Armitage trend test.
