# Supplementary material for: HLA-DQB1*03 Confers Susceptibility to Chronic Hepatitis C in Japanese: A Genome-Wide Association Study
Source: PubMed Central journal article supplement (PMC3871580; doi:10.1371/journal.pone.0084226), 2013-12-20
Supplement: pone.0084226.s010.pdf [file pone.0084226.s010.pdf]

**Table S3. Multiple logistic regression analysis for the risk of chronic hepatitis C using 1st replication samples (4,347 cases and 1,097 controls).**

|                      | <b>OR</b> | <b>(95%CI)</b> | <b><i>P</i></b> |
|----------------------|-----------|----------------|-----------------|
| rs9275572 (C allele) | 0.79      | (0.70-0.89)    | 1.43E-04        |
| Male gender          | 2.04      | (1.73-2.40)    | < 2E-16         |
| Age (y)              | 1.10      | (1.10-1.11)    | < 2E-16         |

OR; odds ratio, CI; confidence interval.
