# Supplementary material for: HLA-DQB1*03 Confers Susceptibility to Chronic Hepatitis C in Japanese: A Genome-Wide Association Study
Source: PubMed Central journal article supplement (PMC3871580; doi:10.1371/journal.pone.0084226), 2013-12-20
Supplement: pone.0084226.s011.pdf [file pone.0084226.s011.pdf]

**Table S4A. Effect of rs9275572 on the susceptibility of chronic hepatitis C stratified by gender and age using 1st replication samples.**

| Subgroup   | Case |      |      | Control |     |     | Protective AF |         | OR (95%CI) <sup>a</sup> | P <sup>b</sup> | P <sub>het</sub> <sup>c</sup> |
|------------|------|------|------|---------|-----|-----|---------------|---------|-------------------------|----------------|-------------------------------|
|            | TT   | TC   | CC   | TT      | TC  | CC  | Case          | Control |                         |                |                               |
| Male       | 318  | 1107 | 941  | 46      | 177 | 191 | 0.632         | 0.675   | 0.83 (0.71-0.97)        | 1.63E-02       | 0.151                         |
| Female     | 317  | 945  | 735  | 73      | 297 | 328 | 0.605         | 0.683   | 0.71 (0.62-0.81)        | 2.77E-07       |                               |
| Age=<40    | 46   | 131  | 117  | 63      | 264 | 282 | 0.621         | 0.680   | 0.77 (0.63-0.95)        | 1.41E-02       | 0.930                         |
| 40<Age=<55 | 139  | 426  | 345  | 32      | 102 | 123 | 0.613         | 0.677   | 0.76 (0.61-0.93)        | 9.27E-03       |                               |
| 55<Age     | 444  | 1488 | 1211 | 24      | 103 | 104 | 0.622         | 0.673   | 0.80 (0.65-0.98)        | 2.79E-02       |                               |

AF; allele frequency, OR; odds ratio, CI; confidence interval.

<sup>a</sup>Odds ratios of protective allele (C) from two-by-two allele frequency table. <sup>b</sup>P value of Cochran-Armitage trend test. <sup>c</sup>Result of Breslow-Day test.

**Table S4B. Effect of rs9275572 on the susceptibility of chronic hepatitis C stratified by HCV genotype using 1st replication samples.**

|                          | vs Control (n=1,112, Protective AF = 0.680) |                         |                |                               |
|--------------------------|---------------------------------------------|-------------------------|----------------|-------------------------------|
|                          | Protective AF                               | OR (95%CI) <sup>a</sup> | P <sup>b</sup> | P <sub>het</sub> <sup>c</sup> |
| HCV genotype 1 (n=2,890) | 0.610                                       | 0.74 (0.66-0.82)        | 7.88E-09       | 0.127                         |
| HCV genotype 2 (n=1,268) | 0.639                                       | 0.83 (0.74-0.94)        | 3.52E-03       |                               |

AF; allele frequency, OR; odds ratio, CI; confidence interval.

<sup>a</sup>Odds ratios of protective allele (C) from two-by-two allele frequency table. <sup>b</sup>P value of Cochran-Armitage trend test. <sup>c</sup>Result of Breslow-Day test.
