# Supplementary material for: HLA-DQB1*03 Confers Susceptibility to Chronic Hepatitis C in Japanese: A Genome-Wide Association Study
Source: PubMed Central journal article supplement (PMC3871580; doi:10.1371/journal.pone.0084226), 2013-12-20
Supplement: pone.0084226.s012.pdf [file pone.0084226.s012.pdf]

**Table S5A. Useful variants for genotyping common *HLA-DQA1* haplotypes in the Japanese population.**

| Variation | rs12722051 | rs10093    | rs1142324  | rs9272709  |
|-----------|------------|------------|------------|------------|
| Location  | 32,549,147 | 32,549,173 | 32,549,207 | 32,549,279 |
| *0101     | A          | G          | C          | C          |
| *0102     | A          | C          | C          | C          |
| *0103     | T          | C          | C          | C          |
| *0301     | A          | G          | T          | T          |
| *0401     | A          | C          | T          | C          |
| *0501     | A          | C          | T          | T          |
| *0601     | T          | C          | T          | C          |

**Table S5B. Useful variants for genotyping common *HLA-DQB1* haplotypes in the Japanese population.**

| Variation | rs41540813 | rs1130370  | rs1063318  | rs1049083  | rs1140313  | rs1130380  | rs41552812 | rs1071637  |
|-----------|------------|------------|------------|------------|------------|------------|------------|------------|
| Location  | 32,572,790 | 32,572,749 | 32,572,745 | 32,572,724 | 32,572,700 | 32,572,694 | 32,572,689 | 32,572,688 |
| *0301     | G          | T          | C          | A          | T          | C          | G          | A          |
| *0302     | G          | T          | C          | G          | T          | C          | G          | C          |
| *0303     | G          | T          | C          | G          | T          | C          | G          | A          |
| *0401     | T          | T          | C          | G          | T          | G          | G          | A          |
| *0402     | G          | T          | C          | G          | T          | G          | G          | A          |
| *0501     | G          | T          | T          | G          | A          | G          | G          | T          |
| *0502     | G          | T          | T          | G          | A          | G          | A          | G          |
| *0503     | G          | T          | T          | G          | A          | G          | G          | A          |
| *0601     | G          | G          | T          | G          | A          | G          | G          | A          |
| *0602     | G          | T          | C          | G          | A          | G          | G          | A          |
| *0604     | G          | T          | C          | G          | A          | G          | G          | T          |
