# Supplementary material for: HLA-DQB1*03 Confers Susceptibility to Chronic Hepatitis C in Japanese: A Genome-Wide Association Study
Source: PubMed Central journal article supplement (PMC3871580; doi:10.1371/journal.pone.0084226), 2013-12-20
Supplement: pone.0084226.s013.pdf [file pone.0084226.s013.pdf]

**Table S6. Haplotype analysis.**

| Haplotype |          |           | Frequency |         | OR <sup>a</sup> | (95%CI)     | P <sup>b</sup> |
|-----------|----------|-----------|-----------|---------|-----------------|-------------|----------------|
| HLA-DQA1  | HLA-DQB1 | rs9275572 | Case      | Control |                 |             |                |
| *0103     | *0601    | C         | 0.210     | 0.189   | 1.15            | (0.98-1.34) | 0.083          |
| *0301     | *0303    | C         | 0.130     | 0.175   | 0.70            | (0.59-0.83) | 5.68E-05       |
| *0301     | *0401    | T         | 0.140     | 0.133   | 1.05            | (0.88-1.26) | 0.558          |
| *0301     | *0302    | C         | 0.093     | 0.102   | 0.90            | (0.73-1.11) | 0.317          |
| *0101     | *0501    | C         | 0.070     | 0.079   | 0.88            | (0.70-1.11) | 0.282          |
| *0102     | *0602    | T         | 0.073     | 0.060   | 1.22            | (0.95-1.56) | 0.119          |
| *0501     | *0301    | C         | 0.060     | 0.069   | 0.87            | (0.67-1.11) | 0.262          |
| *0102     | *0604    | T         | 0.057     | 0.047   | 1.25            | (0.94-1.64) | 0.122          |
| *0101     | *0503    | T         | 0.054     | 0.036   | 1.54            | (1.13-2.08) | 0.005          |
| *0301     | *0402    | T         | 0.029     | 0.019   | 1.54            | (1.02-2.32) | 0.040          |
| *0101     | *0502    | C         | 0.023     | 0.023   | 1.00            | (0.66-1.51) | 0.997          |
| *0401     | *0402    | T         | 0.024     | 0.019   | 1.30            | (0.85-1.98) | 0.225          |
| *0601     | *0301    | C         | 0.013     | 0.021   | 0.64            | (0.39-1.04) | 0.070          |

<sup>a</sup>Odds ratios of haplotype from two-by-two frequency table. <sup>b</sup>P value of chi-squared test.

Haplotype analysis was performed using landmark SNP (rs9275572) and 12 variants shown in Table S5A and S5B by HaploView software.

Only haplotypes with frequencies of more than 1% were shown.
