# Supplementary material for: HLA-DQB1*03 Confers Susceptibility to Chronic Hepatitis C in Japanese: A Genome-Wide Association Study
Source: PubMed Central journal article supplement (PMC3871580; doi:10.1371/journal.pone.0084226), 2013-12-20
Supplement: pone.0084226.s014.pdf [file pone.0084226.s014.pdf]

**Table S7. Single marker effect on chronic hepatitis C.**

|              | Single marker | Protective | Frequency |         | OR <sup>a</sup> | (95%CI)     | P <sup>b</sup> |
|--------------|---------------|------------|-----------|---------|-----------------|-------------|----------------|
|              |               | allele     | Case      | Control |                 |             |                |
| <i>DQA1</i>  | rs12722051    | A          | 0.776     | 0.789   | 0.92            | (0.79-1.07) | 2.80E-01       |
| <i>DQA1</i>  | rs10093       | G          | 0.543     | 0.571   | 0.89            | (0.79-1.01) | 7.14E-02       |
| <i>DQA1</i>  | rs1142324     | T          | 0.506     | 0.558   | 0.81            | (0.72-0.92) | 9.00E-04       |
| <i>DQA1</i>  | rs9272709     | T          | 0.460     | 0.508   | 0.83            | (0.73-0.94) | 2.40E-03       |
| <i>DQB1</i>  | rs1071637     | C and G    | 0.259     | 0.270   | 0.94            | (0.82-1.08) | 4.14E-01       |
| <i>DQB1</i>  | rs41552812    | A          | 0.029     | 0.029   | 0.98            | (0.68-1.41) | 9.08E-01       |
| <i>DQB1</i>  | rs1130380     | C          | 0.313     | 0.387   | 0.72            | (0.63-0.82) | 6.08E-07       |
| <i>DQB1</i>  | rs1140313     | T          | 0.507     | 0.561   | 0.81            | (0.71-0.91) | 5.00E-04       |
| <i>DQB1</i>  | rs1049083     | A          | 0.083     | 0.096   | 0.85            | (0.68-1.05) | 1.32E-01       |
| <i>DQB1</i>  | rs1063318     | C          | 0.637     | 0.668   | 0.87            | (0.77-0.99) | 3.63E-02       |
| <i>DQB1</i>  | rs1130370     | T          | 0.790     | 0.812   | 0.87            | (0.75-1.02) | 8.50E-02       |
| <i>DQB1</i>  | rs41540813    | G          | 0.860     | 0.866   | 0.95            | (0.79-1.13) | 5.39E-01       |
| Landmark SNP | rs9275572     | C          | 0.623     | 0.686   | 0.76            | (0.66-0.86) | 2.07E-05       |

<sup>a</sup>Odds ratios of protective allele from two-by-two allele table. <sup>b</sup>P value of chi-squared test.
