# Supplementary material for: HLA-DQB1*03 Confers Susceptibility to Chronic Hepatitis C in Japanese: A Genome-Wide Association Study
Source: PubMed Central journal article supplement (PMC3871580; doi:10.1371/journal.pone.0084226), 2013-12-20
Supplement: pone.0084226.s015.pdf [file pone.0084226.s015.pdf]

**Table S8. Results of GWAS of two SNPs.**

| <i>Locus</i>  | SNP       | Allele | Case |     |     | Control |      |      | MAF   |         | OR <sup>a</sup> (95%CI) | <i>P</i> <sup>b</sup> | GWAS ranking |
|---------------|-----------|--------|------|-----|-----|---------|------|------|-------|---------|-------------------------|-----------------------|--------------|
|               |           | [1/2]  | 11   | 12  | 22  | 11      | 12   | 22   | Case  | Control |                         |                       |              |
| <i>HLA-DQ</i> | rs9275572 | C/T    | 96   | 217 | 168 | 366     | 1317 | 1280 | 0.425 | 0.346   | 0.71(0.62-0.82)         | 2.62E-06              | 9            |
| <i>IL28B</i>  | rs8099917 | G/T    | 12   | 104 | 365 | 37      | 525  | 2401 | 0.133 | 0.101   | 0.73(0.60-0.90)         | 3.22E-03              | 1640         |

MAF; minor allele frequency, OR; odds ratio, CI; confidence interval.

<sup>a</sup>Odds ratio of allele[1] as reference. <sup>b</sup>*P* value of Cochran-Armitage trend test.
