# Supplementary material for: HLA-DQB1*03 Confers Susceptibility to Chronic Hepatitis C in Japanese: A Genome-Wide Association Study
Source: PubMed Central journal article supplement (PMC3871580; doi:10.1371/journal.pone.0084226), 2013-12-20
Supplement: pone.0084226.s016.pdf [file pone.0084226.s016.pdf]

**Table S9. Case-control association analysis of 5 variants under different genetic models**

| SNP         | Protective AF |         | Genetic Model         |                      |                       |                  |                        |                  |
|-------------|---------------|---------|-----------------------|----------------------|-----------------------|------------------|------------------------|------------------|
|             | Case          | Control | Genotype <sup>a</sup> | Allelic <sup>b</sup> | Dominant <sup>c</sup> |                  | Recessive <sup>c</sup> |                  |
|             |               |         | <i>P</i>              | <i>P</i>             | <i>P</i>              | OR (95%CI)       | <i>P</i>               | OR (95%CI)       |
| rs8099917   | 0.877         | 0.903   | 2.07E-02              | 5.65E-03             | 3.16E-01              | 0.66 (0.30-1.49) | 5.95E-03               | 0.75 (0.60-0.92) |
| rs12979860  | 0.872         | 0.899   | 1.52E-02              | 4.19E-03             | 3.34E-01              | 0.68 (0.32-1.48) | 4.10E-03               | 0.74 (0.60-0.91) |
| ss469415590 | 0.872         | 0.900   | 1.12E-02              | 3.03E-03             | 3.34E-01              | 0.68 (0.32-1.48) | 2.88E-03               | 0.73 (0.59-0.90) |
| rs9275572   | 0.616         | 0.682   | 5.30E-05              | 7.26E-06             | 5.34E-04              | 0.64 (0.49-0.82) | 1.63E-04               | 0.72 (0.61-0.85) |
| rs1130380   | 0.313         | 0.383   | 1.98E-05              | 1.62E-06             | 2.22E-05              | 0.69 (0.58-0.82) | 1.03E-03               | 0.66 (0.51-0.85) |

AF; allele frequency, OR; odds ratio, CI; confidence interval. *P* values were calculated using chi-squared test.

<sup>a</sup> the test of association in the 2-by-3 table of disease-by-genotype. <sup>b</sup> the test of association under the allelic model.

<sup>c</sup> the test of association under the dominant and recessive models for the protective allele.
