# Supplementary material for: HLA-DQB1*03 Confers Susceptibility to Chronic Hepatitis C in Japanese: A Genome-Wide Association Study
Source: PubMed Central journal article supplement (PMC3871580; doi:10.1371/journal.pone.0084226), 2013-12-20
Supplement: pone.0084226.s017.pdf [file pone.0084226.s017.pdf]

**Table S10. Basic characteristics of study population.**

|                        | Case                                                | Control                                                                                        |
|------------------------|-----------------------------------------------------|------------------------------------------------------------------------------------------------|
| <b>GWAS</b>            |                                                     |                                                                                                |
| n                      | 481                                                 | 2,963                                                                                          |
| Source                 | Toranomon Hosp.                                     | BioBank Japan <sup>a</sup> (n=2,057)<br>Healthy volunteer (Osaka-Midosuji Rotary Club) (n=906) |
| Platform               | Illumina HumanHap610k                               | Illumina HumanHap550k                                                                          |
| Male ratio             | 0.64                                                | 0.533                                                                                          |
| mean age (sd)          | 56.4 (10.3)                                         | 51.9 (16.3)                                                                                    |
| HCV genotype 1 / 2 / 3 | 481 / 0 / 0                                         |                                                                                                |
| <b>1st replication</b> |                                                     |                                                                                                |
| n                      | 4,358                                               | 1,114                                                                                          |
| Source                 | Hiroshima Univ.                                     | Healthy volunteer (Hiroshima Univ.)                                                            |
| Platform               | Invader assay                                       | Invader assay                                                                                  |
| Male ratio             | 0.542                                               | 0.373                                                                                          |
| mean age (sd)          | 61.2 (12.1)                                         | 41.3 (15.0)                                                                                    |
| HCV genotype 1 / 2 / 3 | 2,890 / 1,268 / 9                                   |                                                                                                |
| 1+2 / not tested       | 12 / 183                                            |                                                                                                |
| <b>2nd replication</b> |                                                     |                                                                                                |
| n                      | 1,379                                               | 25,817                                                                                         |
| Source                 | Toranomon Hosp. (1,004)<br>SapporoKosei Hosp. (375) | BioBank Japan <sup>a</sup>                                                                     |
| Platform               | Invader assay                                       | Illumina HumanHap610k                                                                          |
| Male ratio             | 0.513                                               | 0.519                                                                                          |
| mean age (sd)          | 59.1 (11.5)                                         | 63.1 (12.0)                                                                                    |
| HCV genotype 1 / 2 / 3 | 1,066 / 313 / 0                                     |                                                                                                |

<sup>a</sup>The control groups from BioBank Japan consisted of individuals with diseases unrelated to chronic liver diseases.
